# Supplementary material for: Biochemistry-directed hollow porous microspheres: bottom-up self-assembled polyanion-based cathodes for sodium ion batteries
Source: Royal Society of Chemistry journal article supplement (doi:10.1039/c6nr00680a), 2016-01-01
Supplement: c6nr00680a1.pdf [file c6nr00680a1.pdf]

# Supporting information

## Table of contents

### **Section I. Synthesis of Reference Samples**

**S1** Synthesis of the  $\text{Na}_3\text{V}_2(\text{PO}_4)_3$  and  $\text{Na}_{3.12}\text{Fe}_{2.44}(\text{P}_2\text{O}_7)_2$  reference samples.

### **Section II. Calculation Process**

**S2** Calculation process for sodium intercalation coefficients based on the GITT results.

### **Section III. Supporting Figures**

**Figure S1** Pore size analysis results of the biochemistry-directed  $\text{Na}_3\text{V}_2(\text{PO}_4)_3$  hollow porous microspheres.

**Figure S2** Morphology of bio-directed  $\text{Na}_{3.12}\text{Fe}_{2.44}(\text{P}_2\text{O}_7)_2$  hollow microsphere.

**Figure S3** Morphology and physical characteristics of  $\text{Na}_3\text{V}_2(\text{PO}_4)_3$  and  $\text{Na}_{3.12}\text{Fe}_{2.44}(\text{P}_2\text{O}_7)_2$  reference samples.

**Figure S4** Comparison of the  $R_{ct}$  values between the bio-directed and reference samples for the  $\text{Na}_{3.12}\text{Fe}_{2.44}(\text{P}_2\text{O}_7)_2$  composites.

**Figure S5** TEM images of cycled  $\text{Na}_3\text{V}_2(\text{PO}_4)_3$  and  $\text{Na}_{3.12}\text{Fe}_{2.44}(\text{P}_2\text{O}_7)_2$  composites.

### **Section IV. Supporting Tables**

**Table S1** Lattice parameters of the bio-directed and reference samples for  $\text{Na}_3\text{V}_2(\text{PO}_4)_3$  and  $\text{Na}_{3.12}\text{Fe}_{2.44}(\text{P}_2\text{O}_7)_2$  composite.

**Table S2** Atomic ratios of the bio-directed  $\text{Na}_3\text{V}_2(\text{PO}_4)_3$  and  $\text{Na}_{3.12}\text{Fe}_{2.44}(\text{P}_2\text{O}_7)_2$  composites.

## Section I. Synthesis of Reference Samples

### *SI Synthesis of the $\text{Na}_3\text{V}_2(\text{PO}_4)_3$ and $\text{Na}_{3.12}\text{Fe}_{2.44}(\text{P}_2\text{O}_7)_2$ reference samples*

For  $\text{Na}_3\text{V}_2(\text{PO}_4)_3$ , stoichiometric amount of  $\text{Na}_2\text{CO}_3$ ,  $\text{NH}_4\text{H}_2\text{PO}_4$ ,  $\text{NH}_4\text{VO}_3$  and desirable citric acid were dissolved into distilled water under vigorous stirring. Then the mixture was transferred to a water bath at 80 °C under continuously stirring for four hours. The resultant solution was dried overnight and the dry gel was grounded in a motor. Finally, the obtained powders were annealed at 750 °C for 8 hours at flowing argon atmosphere to achieve the  $\text{Na}_3\text{V}_2(\text{PO}_4)_3$  reference sample.

For  $\text{Na}_{3.12}\text{Fe}_{2.44}(\text{P}_2\text{O}_7)_2$ , iron powder was firstly dissolved into citric acid solution under vigorously stirring until a clear sol was formed. Then the mixture of  $\text{Na}_2\text{CO}_3$  and  $\text{NH}_4\text{H}_2\text{PO}_4$  were added into above solution, and it was transferred to a water bath at 80 °C under vigorous stirring for four hours. The resultant solution was dried overnight. Then the obtained dry-gel was grounded in a motor. Finally, the obtained powders were annealed at 600 °C for 8 hours to achieve the  $\text{Na}_{3.12}\text{Fe}_{2.44}(\text{P}_2\text{O}_7)_2$  reference samples.

## Section II. Calculation Process

### *S2 Calculation process for sodium intercalation coefficients based on the GITT results*

The sodium ion intercalation kinetics of the composites is investigated by GITT measurements. According to the Fick's second law of diffusion,  $D_{Na}$  can be calculated from the following equation:<sup>S1</sup>

$$D_{Na} = \frac{4}{\pi} \left( \frac{m_B V_m}{M_B A} \right)^2 \left( \frac{\Delta E_S}{\tau \left( \frac{dE_\tau}{d\sqrt{\tau}} \right)} \right)^2 \quad (\tau \ll L^2 / D_{Na}) \quad (1)$$

where  $D_{Na}$  ( $\text{cm}^2\text{s}^{-1}$ ) is the sodium diffusion coefficient;  $m_B$ ,  $M_B$  and  $V_m$  are the mass, molecular weight and molar volume of the electrode material, respectively;  $A$  is the interfacial area between electrode and electrolyte;  $\tau$  is duration of the current pulse. If the relationship between  $E$  and  $\tau^{1/2}$  is linear, the equation (1) can be simplified as following:<sup>S2</sup>

$$D_{Na} = \frac{4}{\pi\tau} \left( \frac{m_B V_m}{M_B A} \right)^2 \left( \frac{\Delta E_S}{\Delta E_\tau} \right)^2 \quad (2)$$

The linear relationship between  $E$  and  $\tau^{1/2}$  validates the applicability of the equation in this study. Therefore, the  $D_{Na}$  values are obtained based on the equation (2).

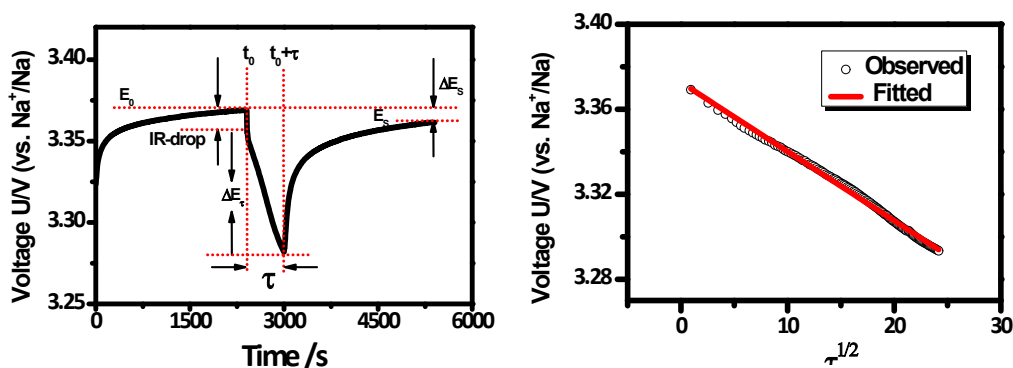

### References:

- [S1] W. Weppner, R. A. Huggins, *J. Electrochem. Soc.* **1977**, 124, 1569.  
[S2] E. Deiss, *Electrochimica Acta* **2005**, 50, 2927.

### Section III. Supporting Figures

**Figure S1** Pore size analysis results of the biochemistry-directed  $\text{Na}_3\text{V}_2(\text{PO}_4)_3$  hollow porous microspheres. The multiple peaks in the pore size analysis demonstrate the hierarchical porous architecture.

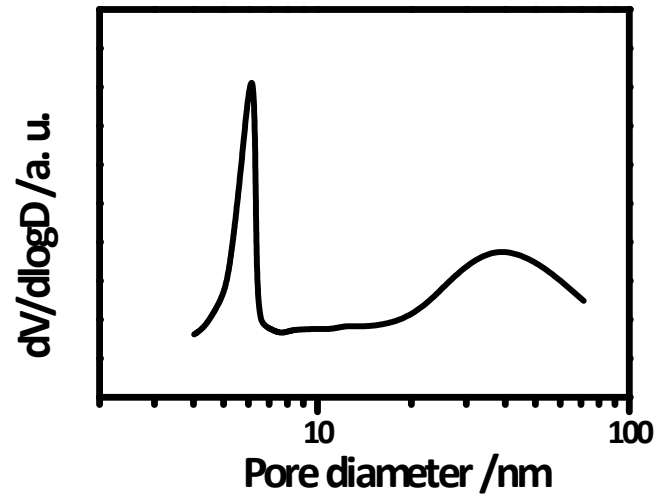

**Figure S2** Morphology of bio-directed  $\text{Na}_{3.12}\text{Fe}_{2.44}(\text{P}_2\text{O}_7)_2$  hollow microsphere. (a,b) TEM image demonstrate the hollow microspherical architecture and porous shell in the  $\text{Na}_{3.12}\text{Fe}_{2.44}(\text{P}_2\text{O}_7)_2$  microsphere; (c) HRTEM image demonstrate the interplanar distance of  $\sim 0.835$  nm, which coincides well with the (011) lattice planes of  $\text{Na}_{3.12}\text{Fe}_{2.44}(\text{P}_2\text{O}_7)_2$ . The results demonstrate the single-phase nature of the  $\text{Na}_{3.12}\text{Fe}_{2.44}(\text{P}_2\text{O}_7)_2$  crystal in the carbon-based framework of the hollow porous microsphere.

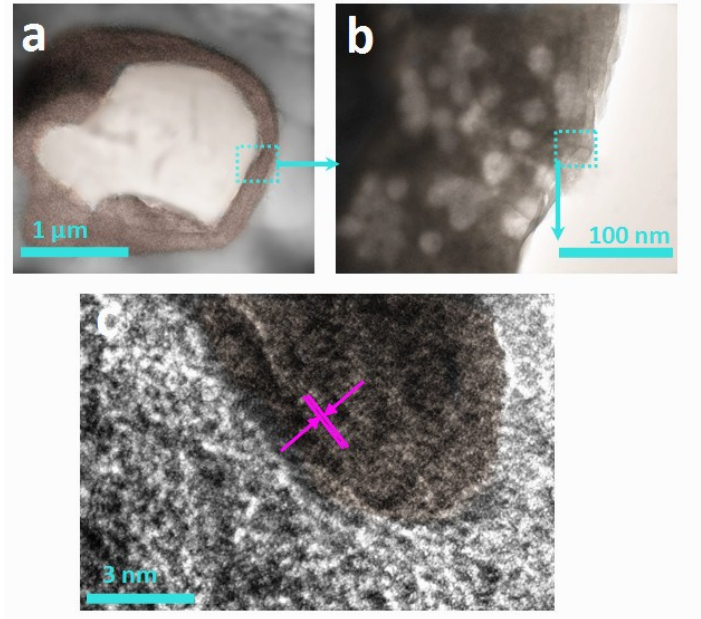

**Figure S3** Morphology and physical characteristics of  $\text{Na}_3\text{V}_2(\text{PO}_4)_3$  and  $\text{Na}_{3.12}\text{Fe}_{2.44}(\text{P}_2\text{O}_7)_2$  reference samples. SEM (a, d) and TEM (b, e) images of  $\text{Na}_3\text{V}_2(\text{PO}_4)_3$  (a, b) and  $\text{Na}_{3.12}\text{Fe}_{2.44}(\text{P}_2\text{O}_7)_2$  (c, d) reference samples. Comparison of the pore volume (c) and carbon content (f) between the bio-directed and reference samples. Both reference samples have irregular and low porous microscale particles, which leads to their lower pore volumes and surface areas than the bio-directed samples.

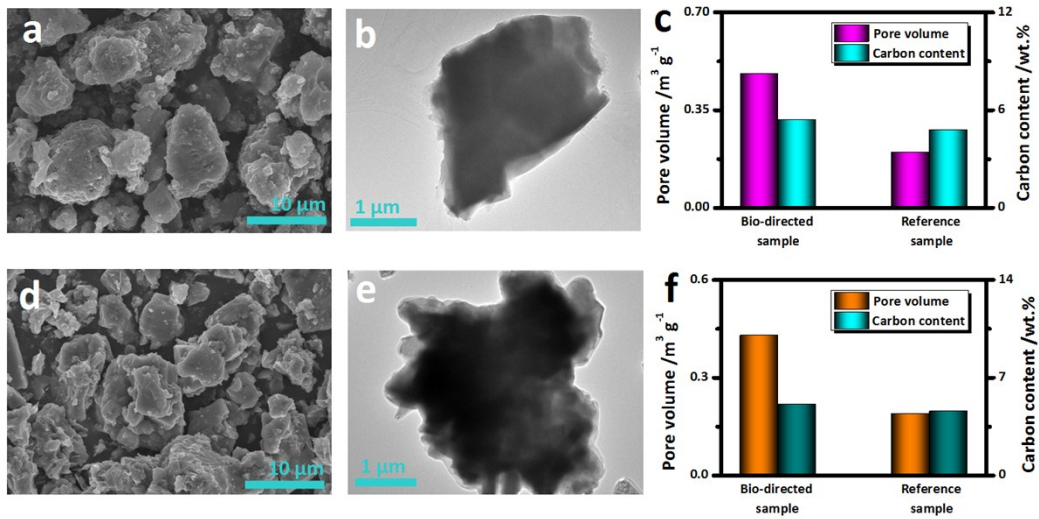

**Figure S4** Comparison of  $R_{ct}$  values between the bio-directed and reference samples for the  $\text{Na}_{3.12}\text{Fe}_{2.44}(\text{P}_2\text{O}_7)_2$  composites. The bio-directed samples exhibit lower  $R_{ct}$  values than the reference one in the whole potential range, which indicates its faster reaction rates. The difference between both samples increase as potential decreases, which demonstrates the superior bulk react capability of bio-directed material than the reference one.

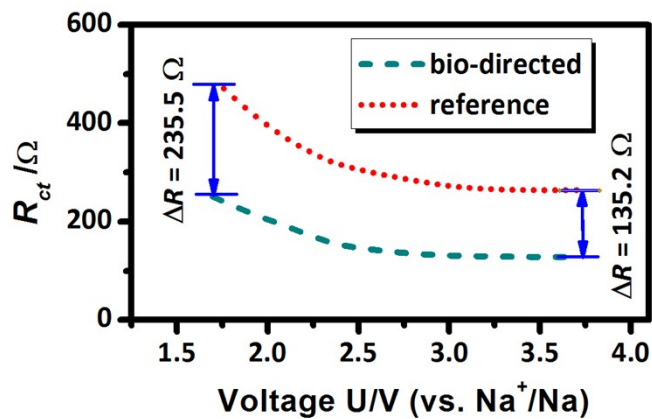

**Figure S5** TEM images of cycled bio-directed  $\text{Na}_3\text{V}_2(\text{PO}_4)_3$  (a) and  $\text{Na}_{3.12}\text{Fe}_{2.44}(\text{P}_2\text{O}_7)_2$  (b) composites. Both materials maintain their spherical architecture after cycles.

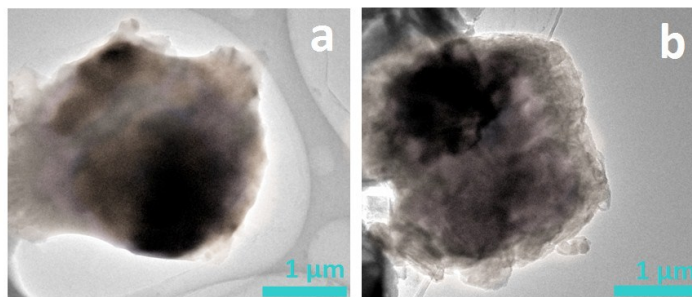

## Section VI. Supporting Tables

Table S1 Lattice parameters of the bio-directed and reference samples for the  $\text{Na}_3\text{V}_2(\text{PO}_4)_3$  (a) and  $\text{Na}_{3.12}\text{Fe}_{2.44}(\text{P}_2\text{O}_7)_2$  (b) composites.

### (a) $\text{Na}_3\text{V}_2(\text{PO}_4)_3$

| Materials    | $a / \text{\AA}$ | $c / \text{\AA}$ |
|--------------|------------------|------------------|
| Bio-directed | 8.7415(2)        | 21.8458(1)       |
| Reference    | 8.7193(5)        | 21.8114(8)       |

### (b) $\text{Na}_{3.12}\text{Fe}_{2.44}(\text{P}_2\text{O}_7)_2$

| Materials    | $a / \text{\AA}$ | $b / \text{\AA}$ | $c / \text{\AA}$ | $\alpha / ^\circ$ | $\beta / ^\circ$ | $\gamma / ^\circ$ |
|--------------|------------------|------------------|------------------|-------------------|------------------|-------------------|
| Bio-directed | 6.4410(8)        | 9.4315(3)        | 11.0223(0)       | 64.4903(2)        | 85.9247(2)       | 72.9818(0)        |
| Reference    | 6.4124(1)        | 9.4365(0)        | 11.0206(7)       | 64.2477(2)        | 85.6062(5)       | 73.2385(3)        |

**Table S2** Atomic ratios of the  $\text{Na}_3\text{V}_2(\text{PO}_4)_3$  and  $\text{Na}_{3.12}\text{Fe}_{2.44}(\text{P}_2\text{O}_7)_2$  bio-directed hollow microspheres.

| Atomic ratio   | $\text{Na}_3\text{V}_2(\text{PO}_4)_3$ | Atomic ratio   | $\text{Na}_{3.12}\text{Fe}_{2.44}(\text{P}_2\text{O}_7)_2$ |
|----------------|----------------------------------------|----------------|------------------------------------------------------------|
| $\text{Na}:V$  | 1.4971                                 | $\text{Na}:Fe$ | 1.2758                                                     |
| Designed value | 1.5                                    | Designed value | 1.2787                                                     |
